# Supplementary material
Source: MDPI journal article supplement (https://www.mdpi.com/1424-2818/14/2/68)
Supplement: s1 [file s1]

## **Supplementary material**

# **Genetic diversity and structure of *Anax imperator* Leach, 1815 populations (Odonata: Aeshnidae) in ponds at regional and European scales**

**Journal : *Diversity***

**Marceau Minot<sup>1\*</sup>; Aurélie Husté<sup>1</sup>**

<sup>1</sup> Normandie Univ, UNIROUEN, IRSTEA, ECODIV, 76000 Rouen

\* Correspondence: m.minot@hotmail.fr

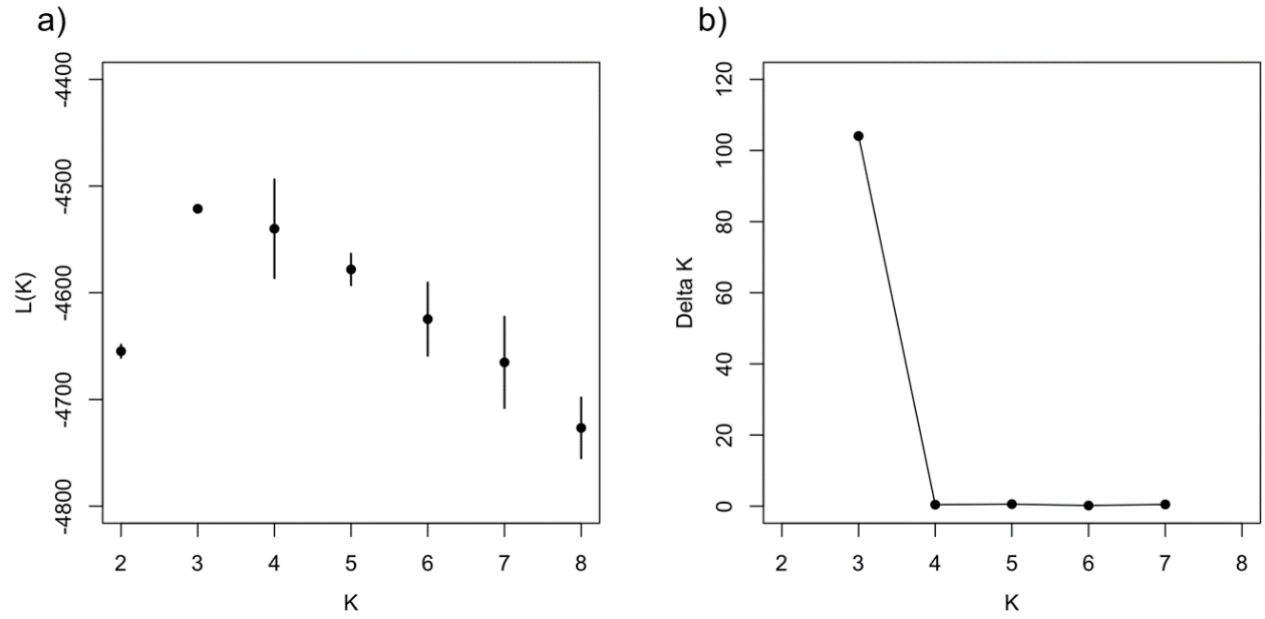

**Figure S1.** Estimation of number of clusters (K) with STRUCTURE using a) mean of estimated Ln probabilities of data ( $\pm$  SD) for each K-value and b) Delta K for each K-value (Evanno's method).

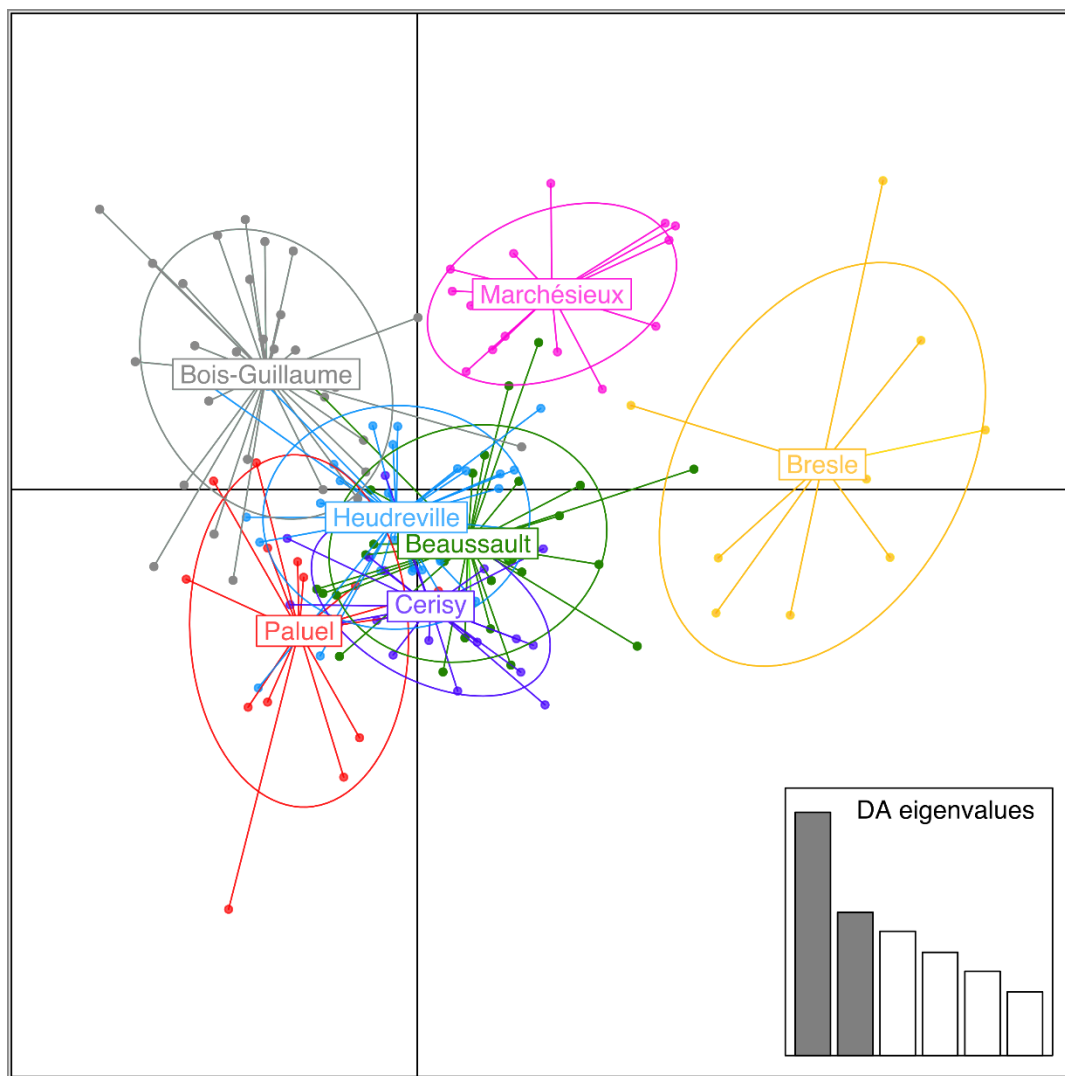

**Figure S2.** Discriminant Analysis of Principal Components results of *Anax imperator* individuals of sampled French populations.

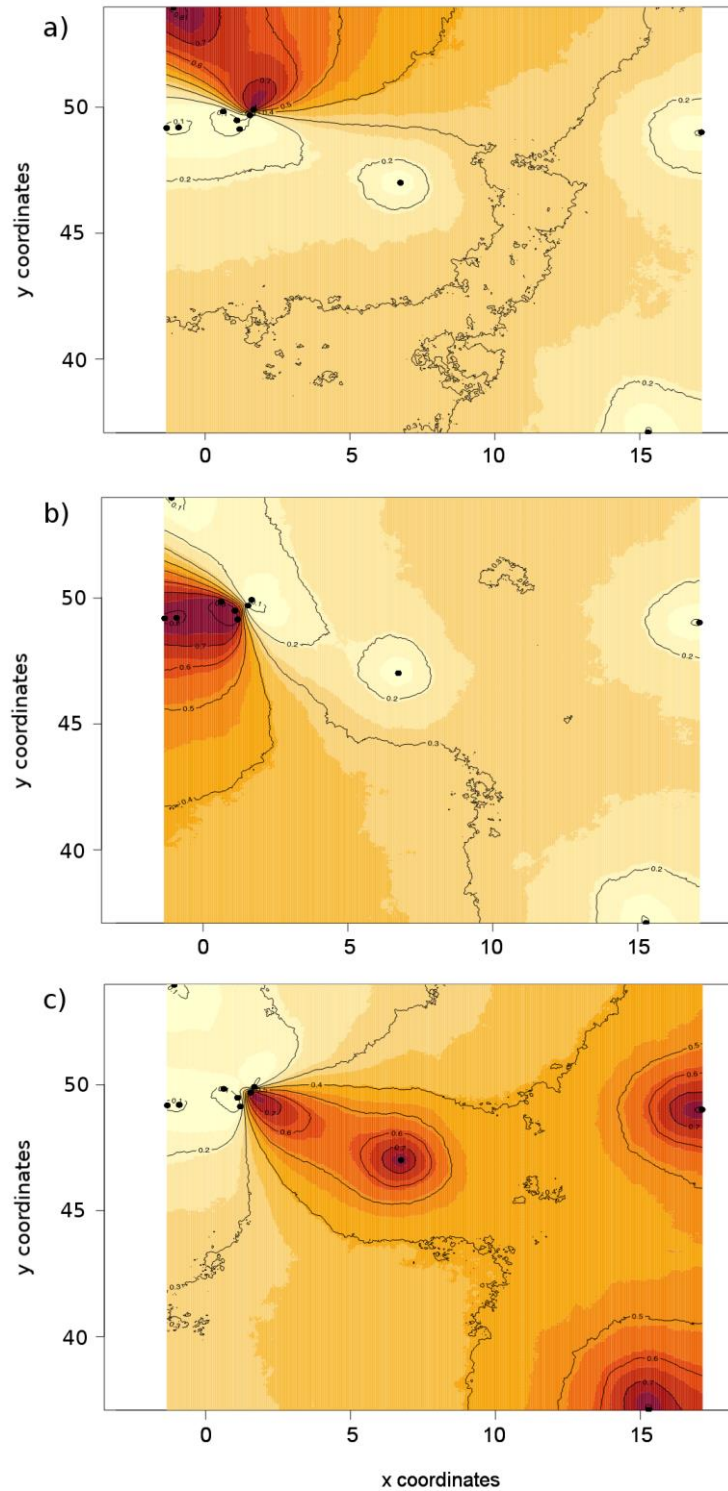

**Figure S3.** Results of spatial Geneland analysis on the 11 populations of *Anax imperator*. Each figure corresponds to a cluster identified by Geneland. Black dots indicate the position of the populations (see Fig. 1). Black lines indicated the posterior probabilities of membership in the three clusters, with darker colours (red) indicating highest posterior probabilities of belonging to the cluster.
